# Supplementary material for: Developing Mixed Matrix Membranes with Good CO2 Separation Performance Based on PEG-Modified UiO-66 MOF and 6FDA-Durene Polyimide
Source: MDPI journal article supplement (doi:10.3390/polym15224442), 2023-11-17
Supplement: s1 [file s1]

## **Supporting Information for**

# **Developing mixed matrix membranes with good CO<sub>2</sub> separation performance based on PEG-modified UiO-66 MOF and 6FDA-durene polyimide**

**Kavya Adot Veetil <sup>1,2,†</sup>, Asmaul Husna <sup>1,2,†</sup>, Md. Hodayun Kabir <sup>1,2</sup>, Insu Jeong <sup>1,2</sup>,  
Ook Choi <sup>1,2</sup>, Iqbal Hossain <sup>1,2</sup>, Eun kyu Sun <sup>1,2</sup> and Tae-Hyun Kim <sup>1,2,\*</sup>**

<sup>1</sup> Organic Material Synthesis Laboratory, Department of Chemistry, Incheon National University,  
Incheon 406-772, Republic of Korea

<sup>2</sup> Research Institute of Basic Sciences, Core Research Institute, Incheon National University, 119 Academy-ro,  
Yeonsu-gu, Incheon 22012, Republic of Korea

\* Correspondence: tkim@inu.ac.kr

† These authors contributed equally to this work.

**This file includes:**

Experimentals

Figure S1 & S2 & S3

Table S1 & S2

## Experimentals

### S1. Gas Permeation Measurement: Constant-Volume/Variable-Pressure Measurements

#### S 1.1. Single gas separation analysis

Gas permeability measurements of pure gases were evaluated using a vacuum-applied time-lag instrument based on a constant-volume/variable-pressure method. All of the experiments were carried out at a feed pressure of 1 bar and a temperature of 30 °C. To remove all residual gases, before the measurement, both upstream and downstream were evacuated thoroughly to below  $10^{-5}$  Torr ( $1.33 \times 10^{-8}$  bar) until the readout appeared to be zero. The downstream volume was found to be 57 cm<sup>3</sup> by calibration using a Kapton membrane. A Baraton transducer (MKS; Model No. 626B02TBE) with full scales of 10,000 and 2 Torr was used to measure the upstream and downstream pressures respectively. The permeate side pressure was recorded as a function of time using a transducer. The permeability coefficient was obtained from the linear slope of the downstream pressure versus a time plot (dp/dt) according to the following equation:

$$P = \frac{273 \text{ K}}{76 \text{ cmHg}} \times \frac{Vl}{ATp_0} \times \frac{dp}{dt} \quad (1)$$

Where P is the permeability expressed in barrer (1 Barrer =  $10^{-10}$  [cm<sup>3</sup> (STP) cm cm<sup>-2</sup> s<sup>-1</sup> cm Hg<sup>-1</sup> ], V (cm<sup>3</sup> ) is the downstream volume, l (cm) is the membrane thickness, A (cm<sup>2</sup> ) is the effective area of the membrane, T (K) is

the measurement temperature,  $p_o$  (Torr) is the pressure of the feed gas in the upstream chamber, and  $dp/dt$  is the rate of the pressure change under a steady state. The permeation tests were repeated at least three times for each gas and the standard deviation from the mean values of the permeabilities was within ca. 3%. The sample-to-sample reproducibility was high and within 3%. The effective membrane areas were 1.13 cm<sup>2</sup>. The ideal perm-selectivity,  $\alpha_{A/B}$ , of the membrane for a pair of gases (A and B) is defined as the ratio of the individual gas permeability coefficients:

$$\alpha_{\frac{A}{B}} = \frac{P_A}{P_B} \quad (2)$$

The diffusivity and solubility were obtained from the time-lag ( $\theta$ ) value according to the following equations:

$$D = \frac{l^2}{6\theta} \quad (3)$$

$$S = \frac{P}{D} \quad (4)$$

Where,  $D$  (cm<sup>2</sup> s<sup>-1</sup>) is the diffusivity coefficient,  $l$  is the membrane thickness (cm), and  $\theta$  is the time lag (s), as obtained from the intercept of the linear steady-state part of the downstream pressure versus a time plot. The solubility,  $S$ , was calculated from Equation (4) with the permeability and diffusivity obtained from Equation (3) and (4).

(a)

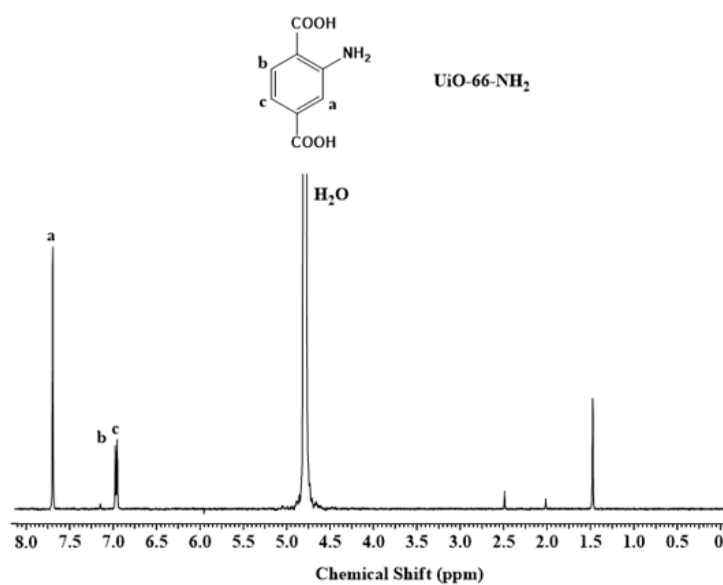

(b)

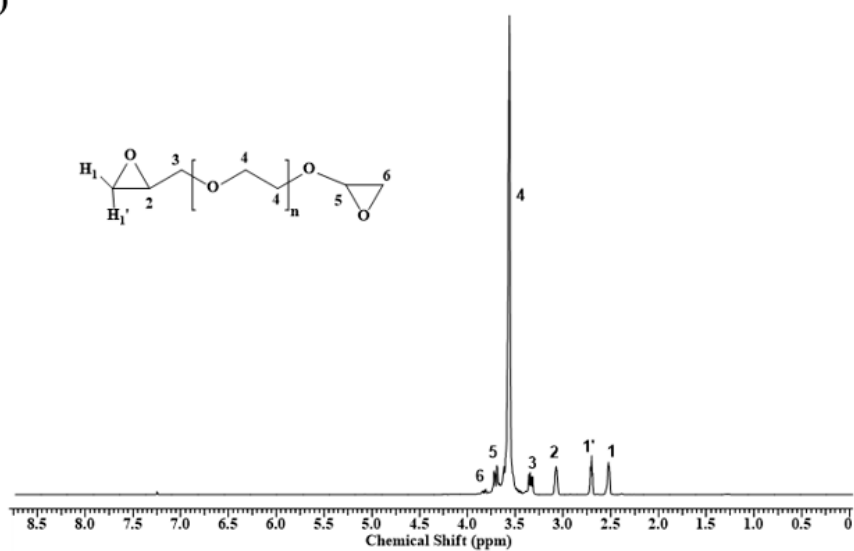

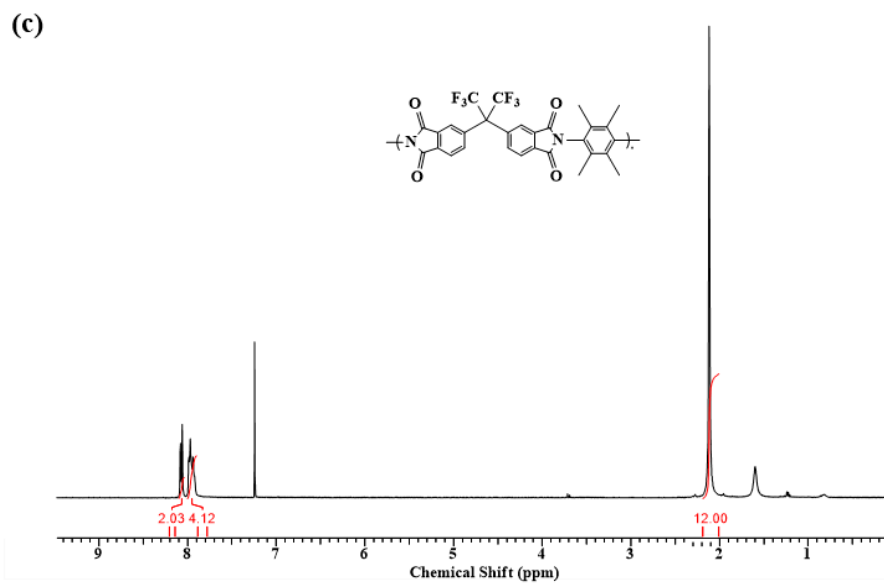

**Figure S1.** <sup>1</sup>H NMR spectra of (a) UiO-66-NH<sub>2</sub>, (b) PEGDE and (c) 6FDA-durene

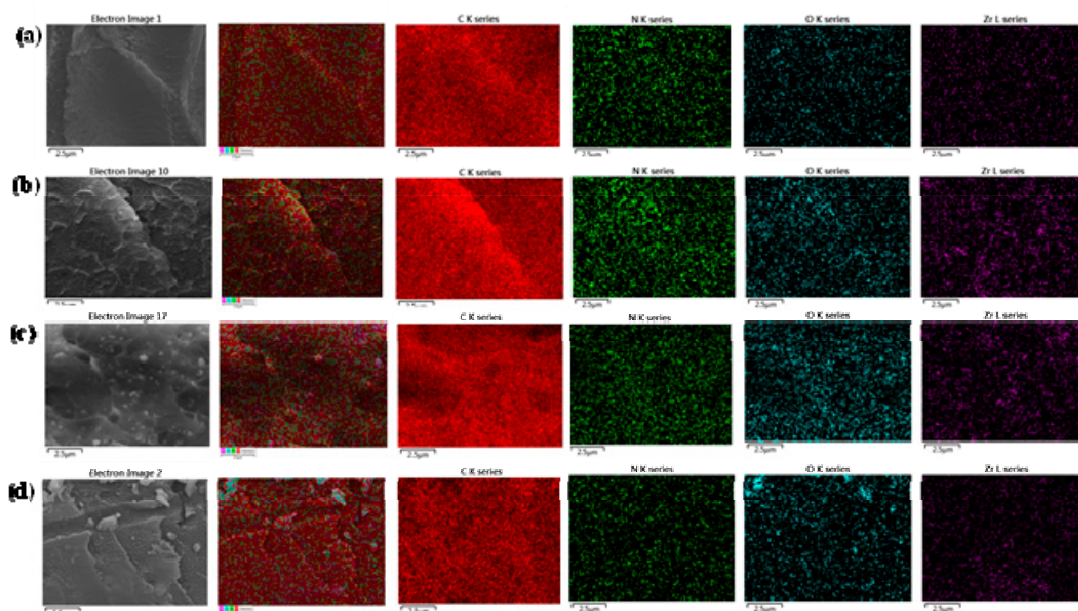

**Figure S2.** EDX elemental mapping images of (a) MMM-3, (b) MMM-5, (c) MMM-10, and (d) MMM-15

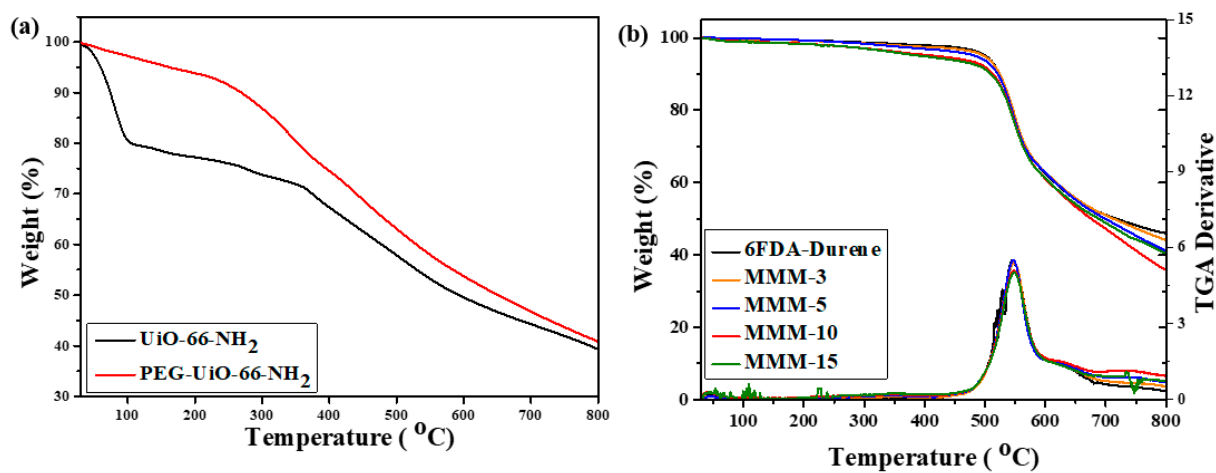

**Figure S3.** Thermal characteristics with respect to the PEG-MOF content (a) UiO-66-NH<sub>2</sub> and PEG-MOF and (b) MMMs

**Table S1.** BET surface area and pore volume of MOF and modified MOF

| Name                   | Surface area<br>m <sup>2</sup> /g | Pore volume |
|------------------------|-----------------------------------|-------------|
| UiO-66-NH <sub>2</sub> | 1041.80                           | 0.458       |
| PEG-MOF                | 317.47                            | 0.179       |

**Table S2.** Gas separation properties of various gas separation membranes

| Filler                             | Polymer                    | Loading<br>(wt %) | Measurement<br>conditions                 | P <sub>CO2</sub> (barrer) | CO <sub>2</sub> /CH <sub>4</sub><br>selectivity | CO <sub>2</sub> /N <sub>2</sub><br>selectivity | Ref. |
|------------------------------------|----------------------------|-------------------|-------------------------------------------|---------------------------|-------------------------------------------------|------------------------------------------------|------|
| PI membranes                       |                            |                   |                                           |                           |                                                 |                                                |      |
| ---                                | 6FDA-MDA                   | ---               |                                           | 15.8                      | 44.9                                            | 24.7                                           | [1]  |
| ---                                | PI-BAFL-6FDA               | ---               | 25 °C at<br>76 cmHg.                      | 98                        | -----                                           | 29                                             | [2]  |
| ---                                | 6FDA-DAM-PI                | ---               | 15 psi and 35 °C                          | 1100                      | 20.9                                            | 19.1                                           | [3]  |
| Commercial Polymers                |                            |                   |                                           |                           |                                                 |                                                |      |
| ---                                | polyurethane               | ---               | 4 bar                                     | 38.4                      | --                                              | 39.2                                           | [4]  |
| ---                                | Pebax                      | ---               | 6 bar; 298 K                              | 299                       | 8.8                                             | 27.2                                           | [5]  |
| ---                                | Cellulose<br>acetate       | ---               |                                           | 6.3                       | 30                                              | 30                                             | [6]  |
| ---                                | Polysulfone                | ---               |                                           | 5.6                       | 22.4                                            | 22.4                                           |      |
| ---                                | Polycarbonate              | ---               |                                           | 4.23                      | 32.5                                            | 23.5                                           |      |
| MMMs                               |                            |                   |                                           |                           |                                                 |                                                |      |
| ZIF-8                              | DMPBI-BuI                  | 30                | 35 oC, 20 bar                             | 53.9                      | 15.7                                            | 11.3                                           | [7]  |
| UiO-66-<br>NH2                     | 6FDA-ODA                   | 25                | 10 bar, 35 °C                             | 13.7                      | 44.7                                            | ---                                            | [8]  |
| UiO-66-<br>NH2                     | 6FDA-Durene                | 20                | 1 bar, 35 °C                              | 1470                      | 16.4                                            | ---                                            | [8]  |
| UiO 66-<br>NH2                     | Matrimid 9725              | 30                | 9 bar; 308 K;<br>equimolar CO2<br>and CH4 | 37.9                      | 47.7                                            | ---                                            | [5]  |
| ZIF-8                              | PU                         | 30                | 4 bar                                     | 14.2                      | 13.7                                            | ---                                            | [5]  |
| ZIF-8                              | Polydopamine-<br>polyimide | 7                 | 1 bar; 308 K                              | 380                       | 25                                              | 19                                             | [5]  |
| ZIF-8                              | Pebax                      | 10                | 6 bar; 298 K                              | 433                       | 8.5                                             | 30.9                                           | [5]  |
| ZIF-8                              | 6FDA-durene                | 33.3 wt %         | 35 °C and 3.5 atm                         | 1552.9                    | 11.07                                           | 11.3                                           | [9]  |
| UiO-66                             | Matrimid                   | 10                | 4 bar, 37 °C                              | 7.8                       | ---                                             | 29.4                                           | [10] |
| Azo-UiO-<br>66                     | Matrimid                   | 10                | 4 bar, 37 °C                              | 10                        | ---                                             | 37                                             |      |
| PEG-<br>UiO-66-<br>NH <sub>2</sub> | 6FDA-Durene                | 0                 | 1 bar, 30 °C                              | 973.9                     | 14.7                                            | 12.7                                           |      |
|                                    |                            | 3                 |                                           | 1572.13                   | 22.6                                            | 19.4                                           |      |
|                                    |                            | 5                 |                                           | 1600                      | 22.2                                            | 19.1                                           |      |
|                                    |                            | 10                |                                           | 1671                      | 23.4                                            | 19.0                                           |      |
|                                    |                            | 15                |                                           | 1789.5                    | 18.1                                            | 14.0                                           |      |

## References:

- [1] Zhang, C.; Cao, B.; Coleman, M. R.; Li, P. Gas Transport Properties in (6FDA-RTIL)-(6FDA-MDA) Block Copolyimides. *J. Appl. Polym. Sci.* **2015**, *133*.
- [2] Kazama, S.; Teramoto, T.; Haraya, K. Carbon Dioxide and Nitrogen Transport Properties of Bis(Phenyl)Fluorene-Based Cardo Polymer Membranes. *J. Membr. Sci.* **2002**, *207*, 91–104.
- [3] Kim, K. J.; Chae, Y.; An, S. J.; Jo, J. H.; Park, S.; Chi, W. S. Microphase-Separated Morphology Controlled Polyimide Graft Copolymer Membranes for CO<sub>2</sub> Separation. *Sep. Purif. Technol.* **2023**, *304*, 122315.
- [4] Rodrigues, M. A.; Ribeiro, J. de; Costa, E. de; Miranda, J. L.; Ferraz, H. C. Nanostructured Membranes Containing UiO-66 (Zr) and MIL-101 (Cr) for O<sub>2</sub>/N<sub>2</sub> and CO<sub>2</sub>/N<sub>2</sub> Separation. *Sep. Purif. Technol.* **2018**, *192*, 491–500.
- [5] Prasetya, N.; Himma, N. F.; Sutrisna, P. D.; Wenten, I. G.; Ladewig, B. P. A Review on Emerging Organic-Containing Microporous Material Membranes for Carbon Capture and Separation. *J. Chem. Eng.* **2020**, *391*, 123575.
- [6] Wu, D.; Hou, R.; Yi, C.; Smith, S. J. D.; Fu, J.; Ng, D.; Doherty, C. M.; Mulder, R. J.; Xie, Z.; Hill, M. R. Enhancing Polyimide-Based Mixed Matrix Membranes Performance for CO<sub>2</sub> Separation Containing PAF-1 and P-DCX. *Sep. Purif. Technol.* **2021**, *268*, 118677.



- [7] Ma, C.; Urban, J. J. Hydrogen-bonded Polyimide/Metal-organic Framework Hybrid Membranes for Ultrafast Separations of Multiple Gas Pairs. *Adv. Funct. Mater.* **2019**, 29.
- [8] Liu, B.; Li, D.; Yao, J.; Sun, H. Improved CO<sub>2</sub> Separation Performance and Interfacial Affinity of Mixed Matrix Membrane by Incorporating UiO-66-PEI@[bmim][Tf<sub>2</sub>N] Particles. *Sep. Purif. Technol.* **2020**, 239, 116519.
- [9] Wijenayake, S. N.; Panapitiya, N. P.; Versteeg, S. H.; Nguyen, C. N.; Goel, S.; Balkus, K. J.; Musselman, I. H.; Ferraris, J. P. Surface Cross-Linking of ZIF-8/Polyimide Mixed Matrix Membranes (MMMs) for Gas Separation. *Ind. Eng. Chem. Res.* **2013**, 52, 6991–7001.
- [10] Prasetya, N.; Donose, B. C.; Ladewig, B. P. A New and Highly Robust Light-Responsive Azo-UiO-66 for Highly Selective and Low Energy Post-Combustion CO<sub>2</sub> Capture and Its Application in a Mixed Matrix Membrane for CO<sub>2</sub>/N<sub>2</sub> Separation. *J. Mater. Chem. A* **2018**, 6, 16390–16402.
